1 **Full Title:** Reemergence of yellow fever virus in southeastern Brazil, 2017-2018: what sparked  
2 the spread?

3 **Short Title:** Yellow fever virus in Brazil, 2017-2018: what sparked the spread?  
4

5 **Authors:** Joelle I. Rosser, MD<sup>1\*</sup>, Karin Nielsen-Saines, MD, MPH<sup>2</sup>, Eduardo Saad, MSc<sup>3</sup>,  
6 Trevon Fuller, PhD<sup>4,5</sup>

7 **Author Affiliations:**

8 <sup>1</sup>Stanford University School of Medicine, Stanford, California, United States of America

9 <sup>2</sup>David Geffen UCLA School of Medicine, Los Angeles, California, United States of America

10 <sup>3</sup>New York City Department of Health and Mental Hygiene, New York, NY, United States of  
11 America

12 <sup>4</sup>University of California, Los Angeles, Institute of the Environment and Sustainability, Los  
13 Angeles, California, United States of America

14 <sup>5</sup>Fundação Oswaldo Cruz, Manguinhos, Rio de Janeiro, Brazil  
15

16

17

18 **\*Corresponding Author:**

19 [jrosser@stanford.edu](mailto:jrosser@stanford.edu) (JIR)

20

21 **Abstract:**

22 *Background:* The 2017-2018 yellow fever virus (YFV) outbreak in southeastern Brazil marked a  
23 reemergence of YFV in urban states that had been YFV free for nearly a century. Unlike earlier  
24 urban YFV transmission, this epidemic was also driven by forest mosquitos. The objective of  
25 this study was to evaluate environmental drivers of this outbreak. *Methodology/Principal*  
26 *Findings:* Using surveillance data from the Brazilian Ministry of Health of human and non-human  
27 primate (NHP) cases of yellow fever, we traced the spatiotemporal progression of the outbreak.  
28 We then assessed the epidemic timing in relation to drought using a monthly Standardized  
29 Precipitation Evapotranspiration Index (SPEI). Lastly, we evaluated demographic risk factors for  
30 rural or outdoor exposure amongst YFV cases. Both human and NHP cases were first identified  
31 in a hot, dry, rural area in northern Minas Gerais before spreading southeast into the more cool,  
32 wet urban states of Espírito Santo, São Paulo, and Rio de Janeiro. Outbreaks also coincided  
33 with drought in all four southeastern states of Brazil. Confirmed YFV cases had an increased  
34 odds of being male (OR 2.58; 95% CI 2.28-2.92), working age (OR: 2.03; 95% CI: 1.76-2.35),  
35 and reporting recent travel from an urban to a rural area (OR: 5.02; 95% CI: 3.76-6.69).  
36 *Conclusions/Significance:* The 2017-2018 YFV epidemic in Brazil originated in hot, dry rural  
37 areas of Minas Gerais before expanding south into urban centers. An unusually severe drought  
38 in this region may have created environmental pressures that sparked the reemergence of YFV  
39 in Brazil's southeastern cities.

40

41 **Author Summary:**

42 In 2017-2018, cities in southeastern Brazil experienced an unusual outbreak of yellow fever  
43 virus. In the early 20<sup>th</sup> century, these cities had large outbreaks of yellow fever, spread by *Aedes*  
44 mosquitos. But until this recent outbreak, they had been free of yellow fever for nearly a century.  
45 While this outbreak was spread by *Haemagogous* forest mosquitos, the reemergence of yellow

46 fever in densely populated urban areas raises serious concerns about it reestablishing ongoing  
47 transmission in cities, spread by urban *Aedes* mosquitos. Our study sought to understand how  
48 and why yellow fever virus reemerged in this area. We traced the outbreak, finding that it started  
49 in hot, dry, rural areas and spread south into cool, wet urban areas. Additionally, the outbreak  
50 coincided with a severe drought; this extreme weather may have promoted the spread of yellow  
51 fever. Infection was also associated with rural and outdoor exposure, further suggesting this  
52 epidemic originated in rural areas.

53

#### 54 **Introduction:**

55       Between December 2016 and July 2019, a YFV outbreak occurred in southeastern  
56 Brazil, resulting in over 2,000 confirmed human cases[1,2]. The height of this epidemic occurred  
57 during the summer seasons of 2017 and 2018. This outbreak was unusual both in its large size  
58 and geographic distribution. Urban transmission cycles involving *Aedes sp.* mosquitos were  
59 responsible for severe YFV epidemics up until the early 20<sup>th</sup> century when aggressive vector-  
60 control and vaccination campaigns eliminated this type of transmission pathway[3]. However,  
61 since the early 1940's, YFV in Brazil has circulated exclusively by a sylvatic transmission cycle  
62 in which *Haemagogus sp.* mosquitos, which live and breed in forest canopies, feed primarily on  
63 non-human primates (NHPs) and only sporadically feed on humans[4–6]. This results in low  
64 level transmission with periodic small outbreaks occurring in rural northern and western forest  
65 states of Brazil.

66       In contrast, the 2017-2018 epidemic occurred in southeastern Brazil, including São  
67 Paulo, Espírito Santo, and Rio de Janeiro, urban states which had not experienced YFV  
68 transmission in nearly a century. Outbreaks of YFV in these urban states raise great concern for  
69 the possibility of an urban transmission cycle resurgence involving *Aedes aegypti* and *Aedes*  
70 *albopictus*[7,8]. These two mosquitos preferentially breed in small water containers and

71 therefore thrive in urban slums with poor water infrastructure[9,10]. In recent decades, Espírito  
72 Santo and Rio de Janeiro have experienced several large outbreaks of other flaviviruses such  
73 as dengue, chikungunya, and Zika which are transmitted by these *Aedes* mosquitos[11–13]. If  
74 YFV reestablished an urban cycle involving *Aedes* in these densely populated, inadequately  
75 vaccinated states, the public health impact could be enormous.

76 Curiously, albeit fortunately, there has been no evidence of *A. aegypti* infection in the  
77 2017-2018 YFV epidemic[8,14]. This in no way precludes the possibility of a future spillover to  
78 *Aedes aegypti*. However, this particular epidemic was driven by conditions promoting  
79 transmission by *Haemagogus* mosquitos[14]. The recent incursion of YFV in the southeastern  
80 states of Brazil suggests that a change in environmental conditions triggered a new  
81 transmission dynamic in southeastern Brazil. While the 2017-2018 YFV epidemic included three  
82 previously unaffected states, it started in the neighboring state of Minas Gerais which did start  
83 having low level YFV transmission in previous years[1]. Minas Gerais is a rural state uniquely  
84 positioned in a transition zone between forested areas to the northwest and the southeastern  
85 coastal states[15]. It is however distinct from Amazon-like forested areas and is comprised  
86 predominantly of a savannah-like *cerrado* biome on the western side of the state and the  
87 Atlantic rainforest on the eastern side (“Mata Atlântica”) which is contiguous with São Paulo,  
88 Espírito Santo, and Rio de Janeiro [2,16].

89 This study aims to evaluate environmental and demographic predictors of the YFV  
90 outbreak in southeastern Brazil. We hypothesize that a severe drought during this time set the  
91 stage for YFV transmission to intensify at the rural-urban interface and then spread into urban  
92 areas. To assess this hypothesis, we traced the evolution of human and non-human primate  
93 (NHP) cases over space and time to demonstrate how the epidemic spread from rural, hot, dry  
94 parts of the southeastern region of Brazil to more urban, cool, wet areas. We also evaluated the

95 timing of the outbreaks in relationship to a drought index. Finally, we evaluated demographic  
96 characteristics of human YFV cases to assess risk factors for rural and outdoor exposures.

97

98 **Methods:**

99

100 *Geographic distribution of human and NHP cases over time:*

101 The number of confirmed human YFV cases by municipality were obtained from the  
102 Sistema de Informação de Agravos de Notificação (SINAN)[17]. Suspected cases of YFV were  
103 classified as confirmed in the SINAN database based on whether the case had serologic or  
104 polymerase chain reaction evidence of an acute yellow fever virus infection. Southeastern Brazil  
105 experiences two main seasons: the more cool and dry ‘winter’ season from May to October and  
106 the more hot and wet ‘summer’ season from November to April, with peak rainfall and high  
107 temperatures in January to February. Based on reported date of symptom onset and seasonal  
108 changes, cases were divided into time periods to show the progression of case counts over the  
109 course of the epidemic.

110 We also obtained data from SINAN on the number of non-human primates (NHPs) that  
111 were found dead, tested positive for YFV, and were reported by state health departments to the  
112 Division of Zoonoses and Vector-borne Diseases of the Ministry of Health from January 2007 to  
113 December 2020 (data received from SINAN)[17]. The surveillance included five genera of  
114 NHPs: *Alouatta*, known as howler monkeys which are small nocturnal frugivores, *Callithrix*,  
115 which are small marmosets whose diet consists of insects, fruits and other plants, and *Cebus*,  
116 *Saimiri*, and *Sapajus*, all of which are medium-sized NHPs that live in large troops [2]. We  
117 pooled the genera and created a map of the municipalities reporting at least one confirmed NHP  
118 case in each of 2016, 2017, and 2018.

119 Human and NHP cases were mapped to municipality in R Studio version 1.1.456 using  
120 the geobr package[18] which pulls municipality boundaries from the Instituto Brasileiro de  
121 Geografia e Estatística (IBGE)[19].

122

123 *Geographic distribution of temperature, rainfall, and population density across southeastern*  
124 *states of Brazil:*

125 Raster data for the historical (1970-2000) monthly mean, minimum, and maximum  
126 temperature and mean rainfall was obtained from WorldClim[20] and then mapped for the  
127 southeastern states of Brazil to depict averages during the summer season (November to April)  
128 and winter season (May to October) over this geographic region using R Studio and the geobr  
129 package[18]. Data on population density in 2017 across this region was obtained from  
130 WorldPop and mapped in R Studio [21].

131

132 *Drought:*

133 To assess drought conditions, we obtained precipitation and temperature for each month  
134 from January 2007 to December 2020 from weather stations in each state. We queried the  
135 databases of the Brazilian National Institute of Meteorology and National Water Agency for all  
136 stations in each state and selected the weather station nearest to the municipality with the  
137 greatest number of human cases of YFV. If two stations were equidistant from the municipality,  
138 we selected the one with the fewest missing observations during the study period. This resulted  
139 in the selection of weather stations in Vitória, Espírito Santo, São Paulo, São Paulo, Teófilo  
140 Otoni, Minas Gerais, and Campos dos Goytacazes, Rio de Janeiro.

141 These data were used to calculate the monthly Standardized Precipitation  
142 Evapotranspiration Index (SPEI), which is a measure of water balance based on rainfall and  
143 temperature [22]. A negative value of the index indicates that the evapotranspiration exceeded

144 precipitation, resulting in a water deficit. Months in which the SPEI assumed a negative value  
145 were anomalously hot and dry, compared to the average climatic conditions during the study  
146 period. We defined drought as months in which the SPEI was less than zero. To calculate the  
147 index, we utilized the aforementioned weather station data and the R package SPEI 1.7. The  
148 SPEI settings consisted of a scale parameter of 8 months and a Gaussian kernel.

149

150 *Rural /outdoor exposure:*

151 Rural or outdoor exposure was assessed based on relevant demographic characteristics  
152 including sex, working age, recent travel history, and occupation as reported to SINAN in 2017  
153 and 2018[17]. Working age was defined as being between the ages of 16 and 65 years old, the  
154 minimum legal working age and the retirement age for men in Brazil, respectively. Travel  
155 history was divided into five categories based on the direction of travel between rural and urban  
156 areas. Age, gender, and travel history were compared between suspected cases of YFV which  
157 were confirmed versus those that were discarded using Fisher's exact test.

158 For the subset of confirmed cases for whom occupation was recorded, occupation was  
159 classified into one of four categories: farmer / rural worker, other outdoor worker, indoor worker,  
160 or 'intermediate' (for jobs which could be both indoors and outdoors). To assess whether  
161 rural/outdoor occupational risk was higher at the beginning of the epidemic, the number of  
162 confirmed cases with a known occupation of farmer/rural worker versus other occupations were  
163 compared between the first (2017) and second (2018) years of the epidemic and between the  
164 start of each new wave (January) and subsequent months (February through December) using  
165 Fisher's exact test.

166 The human data used in this analysis was deidentified data available from an existing  
167 public access database (SINAN) so human subjects ethical review was not required.

168

169 **Results:**

170

171 *Geographic distribution of human and NHP cases over time:*

172           The first human cases of YFV in 2016 were identified in December in the northeastern  
173 region of Minas Gerais. This geographic area is one of the hottest and driest parts of the  
174 southeastern region of Brazil. In January 2017, case counts increased in intensity and spread  
175 outwards from that initial epicenter towards the border of Minas Gerais and Espírito Santo, still a  
176 relatively hot and dry region. For the remainder of the 2017 summer season (ending in May) the  
177 epidemic spread predominately through Espírito Santo, with smaller numbers of cases in the  
178 cooler, wetter states of Rio de Janeiro and São Paulo. A few scattered cases were identified in  
179 all four states during the winter season. When the epidemic reemerged during the following  
180 January 2018, it centered around the cities in the more southeastern part of this region,  
181 including São Paulo, Rio de Janeiro, and Belo Horizonte. (Figure 1)

182           The geospatial progression of human cases roughly paralleled that of NHP cases over  
183 this time (Figure 2). Scattered NHP cases were identified in rural Minas Gerais and São Paulo  
184 throughout 2016. There is one area in the northernmost part of Minas Gerais where multiple  
185 municipalities had NHP cases in 2016. There are several municipalities bordering this area  
186 which had NHP cases in both 2016 and 2017 or 2017 alone. This apparent progression of NHP  
187 cases extended southeast from this rural northern region towards the early epicenter (in  
188 December 2016/January 2017) of human YFV cases in northeastern Minas Gerais. By 2018,  
189 the NHP cases were predominantly centered around municipalities in the more urban,  
190 southeastern part of this region, again overlapping with the human epidemic. (Figure 2)

191

192 *Drought:*



193           A major drought hit southeastern Brazil starting around 2012 and ending around 2019.  
194   We plotted a drought index as measured by the Standardized Precipitation Evaporation Index  
195   (SPEI) from January 1, 2007 to December 31, 2020 against confirmed yellow fever cases in  
196   each of the four southeastern states of Brazil (Figure 3). The model fit between monthly cases  
197   and monthly SPEI as measured by Pearson's correlation coefficient for Minas Gerais, Espírito  
198   Santo, Rio de Janeiro, and São Paulo were 0.17, 0.16, 0.11, and 0.28, respectively. When  
199   limiting this analysis to peak summer months (December to April), when YFV transmission  
200   occurs, Pearson's correlation coefficients mildly increased to 0.26, 0.27, 0.14, and 0.16. This  
201   relatively low model fit is driven largely by the several months of drought in which there were no  
202   cases of YFV.

203           However, the peak of the YFV epidemic did coincide with an elevated drought index in  
204   all four southeastern states. The drought index, SPEI, was consistently over 1.0 (moderate  
205   drought) for a period of two to three years in both Minas Gerais and Espírito Santo when the  
206   epidemic hit those states in 2016, and in Minas Gerais the SPEI exceeded 2.0 (extreme  
207   drought) at the end of 2016 just prior to the start of the epidemic in that state. In Minas Gerais,  
208   the SPEI remained high in 2018 and a second wave of the epidemic hit in 2018, whereas in  
209   Espírito Santo, the SPEI returned to zero shortly after the 2017 epidemic and this state was  
210   almost entirely spared from a second wave of cases in 2018.

211           Rio de Janeiro and São Paulo, which were most affected by the second wave of the  
212   epidemic in 2018, had shorter and more intermittent spikes in the drought index in the years  
213   leading up to the epidemic, rather than the multiple years of sustained elevated SPEI  
214   experienced by the more northern states of Minas Gerais and Espírito Santo. Notably, the SPEI  
215   in 2016 and the first half of 2017 (during the first wave of the epidemic further north) for both Rio  
216   de Janeiro and São Paulo was near zero and then increased to nearly 2.0 (extreme drought) in  
217   early 2018, again coinciding with the peak of the epidemic in those states.

218

219 *Rural /outdoor exposure:*

220 Rural and outdoor exposure was assessed by demographic characteristics including  
 221 sex, age, recent travel history, and occupation. Confirmed cases of YFV were significantly more  
 222 likely to be male (Odds Ratio (OR): 2.58; 95% Confidence Interval (CI): 2.28-2.92) and be of  
 223 working age (OR: 2.03; 95% CI: 1.76-2.35) compared to discarded cases (Table 1). A recent  
 224 history of travel was also significantly associated with confirmed cases of YFV. Travel from an  
 225 urban area to a rural area was the highest risk travel category (OR: 5.02; 95% CI: 3.76-6.69).  
 226 The inverse, travel from a rural area to an urban area, was the only travel category not  
 227 significantly associated with an increased risk of confirmed YFV infection.

| <b>Table 1. Demographic characteristics of confirmed versus discarded YFV cases in 2017 &amp; 2018</b> |                                      |                                      |                         |
|--------------------------------------------------------------------------------------------------------|--------------------------------------|--------------------------------------|-------------------------|
|                                                                                                        | Confirmed Cases<br>(n=2097)<br>N (%) | Discarded Cases<br>(n=8136)<br>N (%) | Odds Ratio<br>(95% CI)  |
| Male                                                                                                   | 1,726 (82.31%)                       | 5,234 (64.33%)                       | <b>2.58 (2.28-2.92)</b> |
| Working age (16-65 years old)*                                                                         | 1,848 (88.13%)                       | 6,230 (78.52%)                       | <b>2.03 (1.76-2.35)</b> |
| <i>Travel (Origin -&gt; Destination)**</i>                                                             |                                      |                                      |                         |
| None (reference)                                                                                       | 1657 (81.03%)                        | 6214 (94.05%)                        | -                       |
| Urban -> rural                                                                                         | 111 (5.43%)                          | 83 (1.26%)                           | <b>5.02 (3.76-6.69)</b> |
| Urban -> urban                                                                                         | 228 (11.15%)                         | 225 (3.41%)                          | <b>3.80 (3.14-4.60)</b> |
| Rural -> rural                                                                                         | 28 (1.37%)                           | 36 (0.54%)                           | <b>2.92 (1.78-4.79)</b> |
| Rural -> urban                                                                                         | 21 (1.03%)                           | 49 (0.74%)                           | 1.60 (0.96-2.68)        |

Abbreviations: YFV = yellow fever virus; CI = confidence interval.

Suspected YFV cases were classified in SINAN as confirmed if they had serologic or polymerase chain reaction evidence of an acute YFV infection. Confirmed YFV cases were more likely to be male, working age, and have a history of travel compared to discarded cases. Travel from an urban area to a rural area was the highest risk travel category. The inverse, travel from a rural area to an urban area, was the only travel category not significantly associated with an increased risk of confirmed YFV infection. Bold font indicate significance at the level of  $p < 0.001$ .

Discarded cases included all cases that were discarded or inconclusive at the time of this analysis.

\*Working age range is based on the Brazilian government's minimum legal age of entry into the labor market and retirement age. 202 discarded cases had missing age information which was not included in this analysis.

\*\*Residence data was missing from 52 confirmed cases and 1,529 discarded cases.

228

229 Occupation was available for 765 (36.5%) of the 2,097 confirmed cases in 2017 and  
230 2018. Farmers/rural workers made up the largest occupational category with 398 (52.0%) of the  
231 766 cases. Confirmed cases were more likely to be a farmer/rural worker than another  
232 occupation in 2017 compared to 2018 (OR: 3.16; 95%CI: 2.32-4.32) and in January compared  
233 to other months (OR: 1.81; 95%CI: 1.34-2.45). (Figure 4)

234

### 235 **Discussion:**

236 Our results show that the YFV outbreaks of 2017-2018 coincided with periods of drought  
237 in all four southeastern states of Brazil affected by this unusual epidemic. We also trace the  
238 epidemic as it starts in the hot, dry northern region of Minas Gerais and spreads east and south

239 into cooler, damper, and more urbanized areas. The pattern of this spatiotemporal progression  
240 is seen with both confirmed human and NHP cases. Lastly, we found an increased risk of yellow  
241 fever associated with demographic characteristics suggestive of outdoor and rural exposure,  
242 including male sex, working age, and recent travel particularly from an urban to a rural area;  
243 additionally, farmer/rural worker was the most common work category, particularly at the start of  
244 outbreaks. These findings are consistent with small genomic sequencing studies that suggest  
245 multiple introductions of YFV from Minas Gerais into the more urban states of Espírito Santo,  
246 Rio de Janeiro, and São Paulo [23–25]. This supports our hypothesis that this epidemic started  
247 in rural areas of Minas Gerais where intermittent transmission had previously occurred and that  
248 environmental conditions during this time were uniquely primed for YFV spread to neighboring  
249 states and urban centers where huge outbreaks occurred. This is also consistent with other  
250 studies that have demonstrated an overall southeastern spread of yellow fever through Brazil  
251 over the past two decades and during this epidemic in particular[26].

252         This 2017-2018 YFV outbreak occurred in a region of Brazil that had not experienced  
253 urban YFV transmission in nearly a century. Around the same time, Brazil experienced one of  
254 the most extreme droughts of the last century[27]. Furthermore, in the four states with these  
255 highly unusual YFV outbreaks, we found that the outbreaks in each state coincided with peaks  
256 in the SPEI drought index over the last two decades. We also found that the outbreaks started  
257 in northern Minas Gerais which is the hottest and driest part of the southeastern region of Brazil.  
258 Our findings are further corroborated by a study conducted by Brazil’s National Center for  
259 Monitoring and Early Warning of Natural Disasters showing that the northern region of Minas  
260 Gerais was the area most severely affected by drought in 2016/2017 with an Integrated Drought  
261 Index at that time classified as extreme drought[27]. Our findings echo other studies which have  
262 also implicated extreme weather events as playing a role in triggering anomalous YFV  
263 outbreaks in Africa[28,29].

264           We postulate that environmental stress caused by drought decreased available habitat,  
265 forcing mosquitos and NHPs to congregate in high densities in the few remaining areas with  
266 adequate food and water. YFV is transmitted in Brazil by *Hemagogus* mosquitos which  
267 predominantly breed in pools of water in trees and feed on NHPs at the top of canopies,  
268 occasionally descending to bite humans when food is scarce. *Hemagogus* sp. can also travel  
269 long distances, up to 11.5 km in just a couple days [30]. During a drought, *Hemagogous* sp.  
270 could therefore seek out more optimal feeding and breeding grounds, concentrating around  
271 remaining water, NHPs, and humans. Howler monkeys frequently spend their days eating in the  
272 tops of canopies where *Hemagogous* sp. live [31]. Howler monkeys (*Alouatta* sp.) and  
273 marmosets (*Callithrix* sp.) are highly adaptable to fragmented, suboptimal habitats[31–33].  
274 These NHPs also commonly cross between rural-urban boundaries and were the two  
275 predominant NHP genera identified in the epizootic YFV surveillance program[1,2]. If NHPs  
276 and *Hemagogus* sp. were forced into higher density conditions in search of water and food,  
277 particularly near rural-urban borders, this could allow for amplification of YFV transmission once  
278 the hot rainy summer season started. Other studies have also shown that increased habitat  
279 stress and fragmentation promotes increased density of both *Hemagogus* sp. and Howler  
280 monkeys [6,34]. There is even some evidence that mosquitos may increase their biting rate  
281 during periods of drought due to dehydration, thereby further promoting viral transmission[35].

282           An additional factor that could have facilitated the spread of YFV from rural into urban  
283 areas at this time is open mosquito niches in urban areas. *Aedes aegypti* is typically the  
284 dominant mosquito species in urban centers in Brazil. However, severe outbreaks of dengue,  
285 chikungunya, and Zika virus in the years just preceding the yellow fever epidemic prompted  
286 aggressive mosquito control efforts. The *Aedes aegypti* index as measured in Rio de Janeiro  
287 had decreased 2 to 3 fold at the start of the YFV outbreak compared to the previous decade  
288 (Figure 5)[36]. Such a decrease in *Aedes aegypti* numbers could have allowed the typically

289 forest dwelling *Hemagogus* sp. to take up residence in this open niche in urban centers.  
290 Although competition between *Aedes aegypti* and *Hemagogus* sp. has not been studied in this  
291 setting, such habitat competition between mosquitos has been documented in other  
292 studies[37,38]. This is further supported by several studies during this epidemic which found no  
293 evidence of YFV transmission by *Aedes aegypti*, despite them being competent vectors in lab  
294 studies, but rather transmission in urban areas predominantly by *Hemagogus* sp. and very  
295 rarely by other (non-aegypti) *Aedes* species [7,8].

296         This study was limited by several factors, most notably by the episodic nature of this  
297 outbreak. The 2017-2018 yellow fever epidemic in southeastern Brazil was a single epidemic in  
298 a new geographic area, which makes it an important and interesting case study. However,  
299 without a longer historical record of epidemics in this region, it is difficult to ascertain whether  
300 spatiotemporal associations, such as the occurrence during a severe drought, are causal or  
301 merely coincidental. The seasonality of YFV also means that there are several months where  
302 yellow fever cases naturally subside. The absence of cases during those months in the middle  
303 of a drought period inherently decreases the model fit between case counts and drought index.  
304 To adjust for this, we conducted a secondary analysis limited to the summer months December  
305 to April during which YFV cases were present. The seasonality of YFV outbreaks during the hot,  
306 wet summer months coincides with peak summer travel. The strong association between travel  
307 and confirmed YFV cases could therefore be confounded by this seasonal travel effect given the  
308 the inherent overlap in these time periods. Despite this limitation, our hypothesis is supported by  
309 the fact that urban to rural travel was most strongly associated with confirmed YFV whereas  
310 travel from rural to urban centers did not have a significant association. This is also consistent  
311 with other data which supports an increased risk with rural / outdoor exposure.

312         This study was also limited by the data available from surveillance systems. The  
313 surveillance system primarily captured hospitalized cases of yellow fever and would have

314 missed mild or asymptomatic cases. Surveillance and hospital systems are also not necessarily  
315 equally distributed throughout this region and were likely most robust in more urban areas,  
316 which could somewhat bias the distribution of cases to urban areas. The non-human primate  
317 cases were also captured using a convenience sampling of NHP carcasses that were tested for  
318 evidence of YFV infection; this sampling method would also likely bias towards a more urban  
319 distribution. Even with this potential urban bias in both human and NHP distribution, however,  
320 the epidemic clearly started in more rural areas and there was consistent evidence of increased  
321 risk with rural / outdoor exposure. Within the cases captured by the surveillance system, there  
322 was also some missing data. Although age and sex were nearly universally recorded,  
323 occupation was only available for about a third of confirmed cases. Additionally, this field was a  
324 write-in response which we sorted into four broad categories but detailed information about  
325 outdoor exposure for each occupation type was not available.

326         Despite these limitations, the spread of YFV into areas that had been YFV free for nearly  
327 a century signals changing conditions. Our study identifies patterns which suggest increased  
328 stress during a severe drought may have promoted the amplification of YFV transmission  
329 between mosquitos and NHPs at rural-urban boundaries, ultimately spilling over into a large  
330 human epidemic that spread from rural to urban areas. The reemergence of YFV in densely  
331 populated parts of Brazil raises serious concerns about the potential for reestablishing an urban  
332 transmission cycle which could involve *Aedes aegypti* in the future. More research is needed to  
333 understand what factors may have prevented YFV from reestablishing an infection cycle in  
334 *Aedes aegypti* during this epidemic and therefore what could be done to minimize that risk.

335         Lastly, the results of our study may have the potential to inform decision-making about  
336 YF immunization policies in southeastern Brazil. Currently in this region of the country, the  
337 official immunization calendar only recommends the YFV vaccine for children nine months and  
338 older who live in municipalities deemed to be at high risk of sylvatic YFV[39]. During the 2017-

339 2018 outbreaks, the principal control strategy was ring vaccination of all age groups. The results  
340 of our study reinforce that sylvatic YF has the potential to spread rapidly across hundreds of  
341 kilometers among humans and NHPs in southeastern Brazil. In light of the potential for sylvatic  
342 YF epidemics to expand over considerable distances, decision makers might evaluate other  
343 immunization strategies including mass vaccination[40]. However, we acknowledge that the  
344 formulation of vaccination policy is a complex process that must take into consideration a variety  
345 of factors including the risk of adverse events, and the investment in infrastructure and training  
346 necessary to rollout mass vaccination.  
347



Figure 1. Yellow fever virus outbreak emergence in hot, dry rural areas of southeastern Brazil

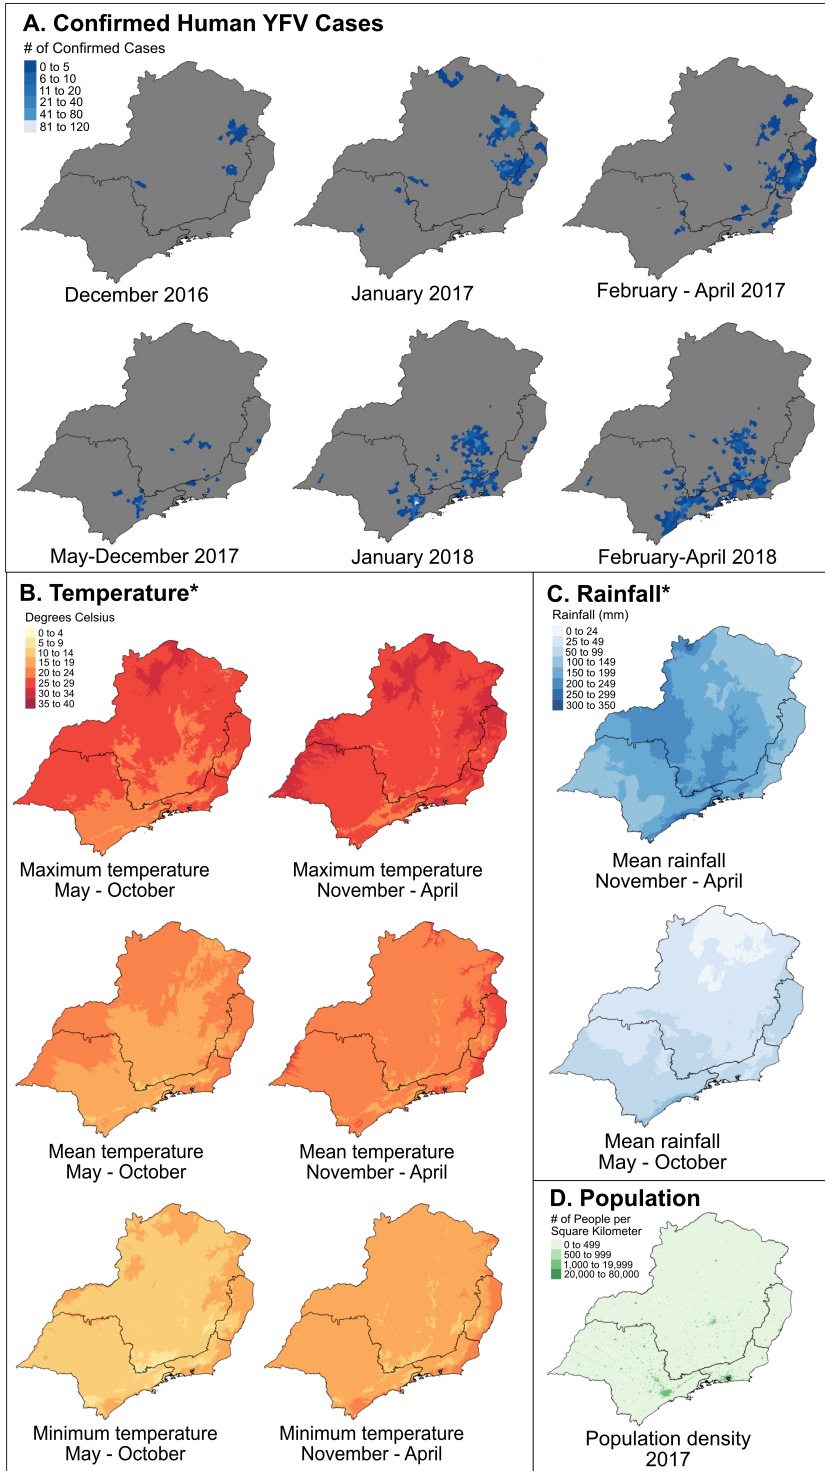

Abbreviations: YFV = yellow fever virus; mm = millimeters.

\*Temperature and rainfall values are derived from the historical average (1970-2000) from WorldClim[20].

A. The YFV outbreak was first identified in the northeastern region of Minas Gerais and subsequently spread east into Espírito Santo and then south into São Paulo and Rio de Janeiro. B. The northeastern region of Minas Gerais and Espírito Santo experiences the highest temperatures in this region. Maps on the left show the cooler winter months and on the right show the warmer summer months. C. The northern area of Minas Gerais is also the driest part of this region. D. The northeastern region of Minas Gerais is also the most rural and least densely populated part of this region.

Figure 2: Human & NHP Yellow Fever Viruses Cases by Year

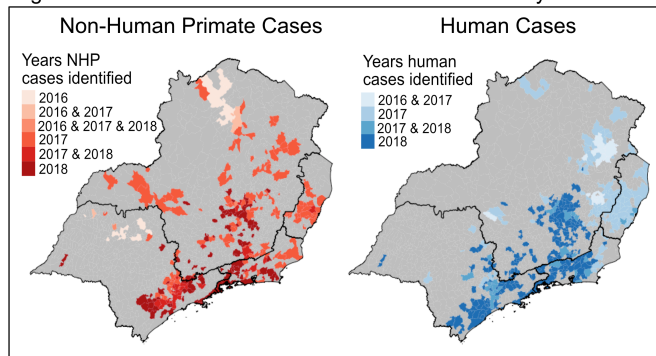

Abbreviations: NHP = Non-human primate.  
NHP cases (left map) were identified in the rural, northern area of Minas Gerais starting in 2016 and continuing through the epidemic in 2017 and 2018. The earliest human cases identified during this outbreak also occurred in northern Minas Gerais in 2016 and 2017. As the epidemic progressed through 2017 and 2018, both NHP and human cases spread south into the urban centers of Rio de Janeiro and São Paulo.

349

350

351

Figure 3. Timing of Drought & Yellow Fever Outbreaks

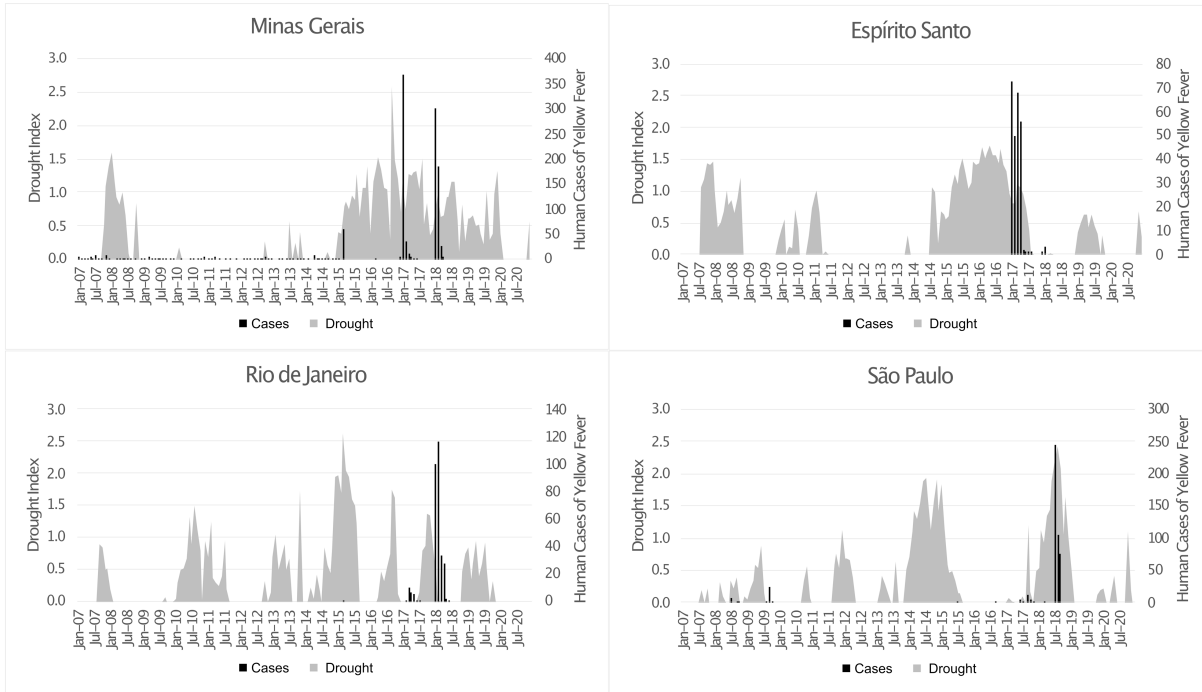

Abbreviations: Jan = January; Jul = July.

The "Drought Index" is derived from the Standardized Precipitation Evapotranspiration Index (SPEI) which measures water balance based on rainfall and temperature. A negative value of SPEI indicates a water deficit; a negative SPEI is represented here by increased drought index. The number of yellow fever virus cases reported in each state is represented by the black bars.

Yellow fever virus outbreaks coincided with severe drought conditions in each of the four southeastern states of Brazil.

352

Figure 4. Occupation of yellow fever virus cases over the course of the epidemic

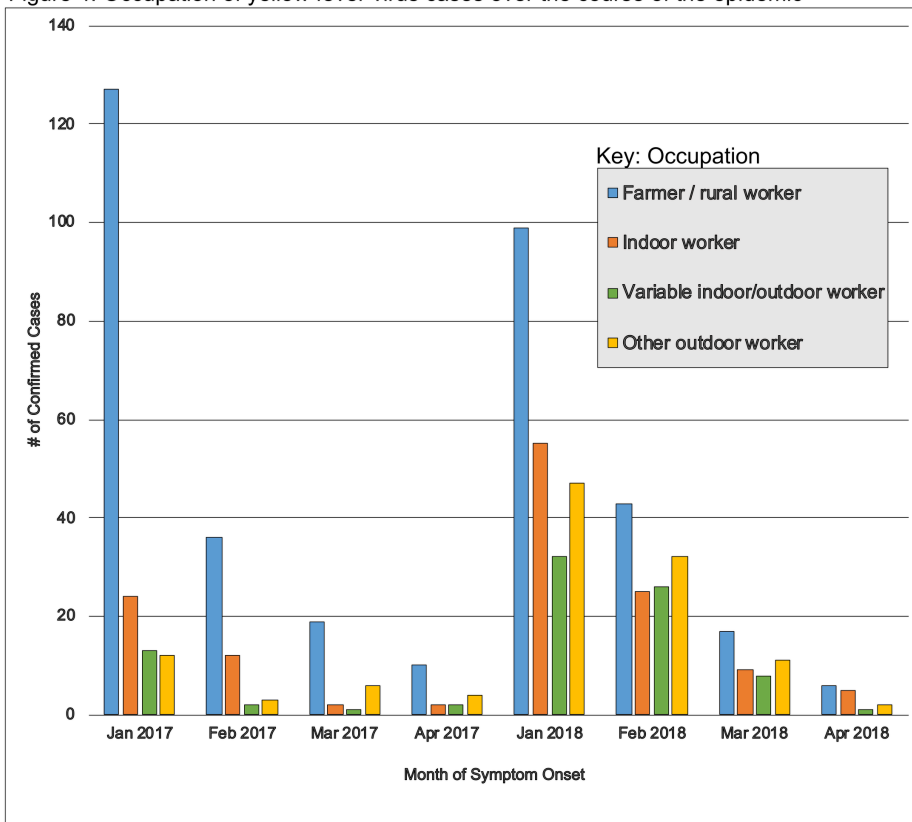

Abbreviations: Jan = January; Feb = February; Mar = March; Apr = April.

Farmers and rural workers (blue bars) dominated the cases in the first year of the epidemic (2017). This was also the predominant group at the start of each wave of the epidemic (January 2017 & January 2018).

Figure 5. *Aedes aegypti* building infestation index in Rio de Janeiro, 2008-2020

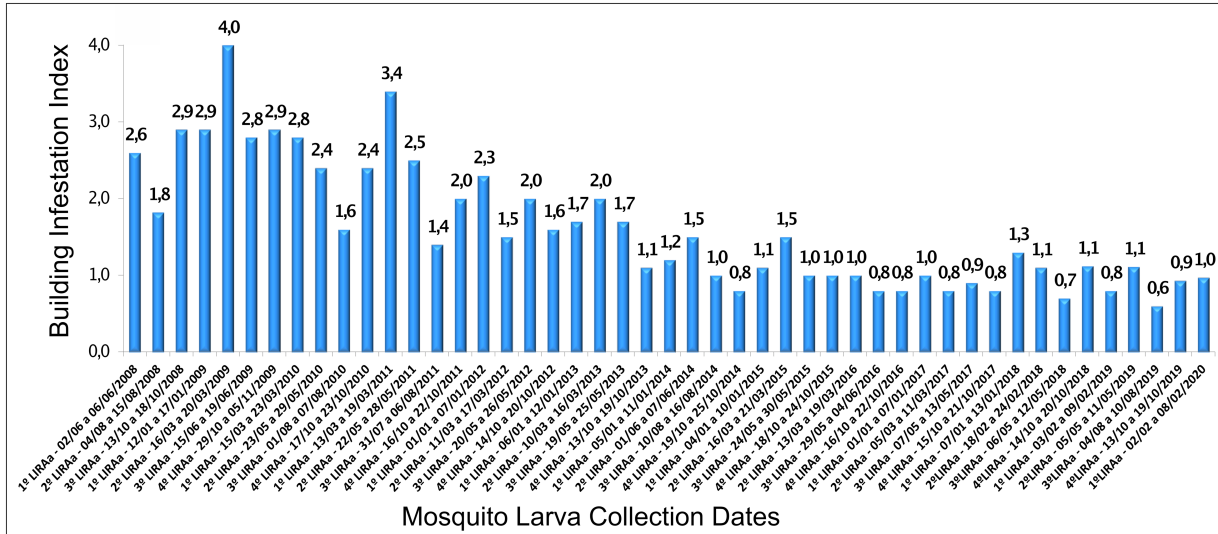

Abbreviations: LIRAA = Levantamento de Índice Rápido para *Aedes aegypti*; English translation = Rapid Index Survey for *Aedes aegypti*. The LIRAA is the official measure for larval surveys of properties and provides an estimate of how many containers are infested with *Aedes aegypti* larva.

The graph above is taken from the Brazilian Ministry of Health and is available at <http://www.rio.rj.gov.br/web/sms/lira>[36]. Mosquito larva surveys are conducted by the Ministry of Health in Rio De Janeiro 3-4 times a year over a 4-7 day period to measure the building infestation index for *Aedes aegypti* mosquito larva. The *Aedes aegypti* building infestation index has steadily decreased since 2008. When the yellow fever epidemic first hit Rio de Janeiro in 2017, *Aedes aegypti* numbers were at a ten year low. Low *Aedes* counts may be in part due to widespread *Aedes* mosquito control campaigns which were initiated due to outbreaks of dengue, chikungunya, and Zika in the years just prior to and including 2016. This index is not available for other cities in southeastern Brazil, however, numbers were likely similarly low in other cities due to increased control efforts.

355

356 **Acknowledgments:**

357 **Declaration of Interests:** None of the authors have any relevant conflict of interest or other

358 financial disclosures relevant to the subject matter.

359 **Funding/ Grant Support:** J.I.R. is supported by NIH Training Grant 5T32AI052073-14 and by a

360 Stanford University Maternal Child Health Research Institute grant. TF and KNS received

361 support from AI140718 (NIH/ NIAID). None of the authors received financial or material support

362 for the research and work in this manuscript.

363

364 **References:**

- 365 1. Sacchetto L, Silva NIO, Rezende IM de, Arruda MS, Costa TA, Mello ÉM de, et al. Neighbor danger:  
366 Yellow fever virus epizootics in urban and urban-rural transition areas of Minas Gerais state, during  
367 2017-2018 yellow fever outbreaks in Brazil. *PLOS Neglected Tropical Diseases*. 2020;14: e0008658.  
368 doi:10.1371/journal.pntd.0008658
- 369 2. Silva NIO, Sacchetto L, de Rezende IM, Trindade G de S, LaBeaud AD, de Thoisy B, et al. Recent  
370 sylvatic yellow fever virus transmission in Brazil: the news from an old disease. *Virology Journal*.  
371 2020;17: 9. doi:10.1186/s12985-019-1277-7
- 372 3. Chippaux J-P, Chippaux A. Yellow fever in Africa and the Americas: a historical and epidemiological  
373 perspective. *Journal of Venomous Animals and Toxins including Tropical Diseases*. 2018;24: 20.  
374 doi:10.1186/s40409-018-0162-y
- 375 4. Mondet B, Vasconcelos P f. c., Travassos da Rosa A p. a., Travassos da Rosa E s., Rodrigues S g.,  
376 Travassos da Rosa J f. s., et al. Isolation of Yellow Fever Virus from Nulliparous *Haemagogus*  
377 (*Haemagogus*) *janthinomys* in Eastern Amazonia. *Vector-Borne and Zoonotic Diseases*. 2002;2: 47–  
378 50. doi:10.1089/153036602760260779
- 379 5. Gomes A de C, Torres MAN, Paula MB de, Fernandes A, Marassá AM, Consales CA, et al. Ecologia  
380 de *Haemagogus* e *Sabethes* (Diptera: Culicidae) em áreas epizoóticas do vírus da febre amarela,  
381 Rio Grande do Sul, Brasil. *Epidemiologia e Serviços de Saúde*. 2010;19: 101–113.  
382 doi:10.5123/S1679-49742010000200003
- 383 6. Alencar J, Mello CF de, Morone F, Albuquerque HG, Serra-Freire NM, Gleiser RM, et al. Distribution  
384 of *Haemagogus* and *Sabethes* Species in Relation to Forest Cover and Climatic Factors in the

- 385 Chapada Dos Guimarães National Park, State of Mato Grosso, Brazil. *J Am Mosq Control Assoc.*  
386 2018;34: 85–92. doi:10.2987/18-6739.1
- 387 7. Couto-Lima D, Madec Y, Bersot MI, Campos SS, Motta M de A, Santos FB dos, et al. Potential risk of  
388 re-emergence of urban transmission of Yellow Fever virus in Brazil facilitated by competent *Aedes*  
389 populations. *Scientific Reports.* 2017;7: 4848. doi:10.1038/s41598-017-05186-3
- 390 8. Cunha MS, Tubaki RM, de Menezes RMT, Pereira M, Caleiro GS, Coelho E, et al. Possible non-  
391 sylvatic transmission of yellow fever between non-human primates in São Paulo city, Brazil, 2017–  
392 2018. *Scientific Reports.* 2020;10: 15751. doi:10.1038/s41598-020-72794-x
- 393 9. Wong J, Stoddard ST, Astete H, Morrison AC, Scott TW. Oviposition Site Selection by the Dengue  
394 Vector *Aedes aegypti* and Its Implications for Dengue Control. *PLoS Negl Trop Dis.* 2011;5.  
395 doi:10.1371/journal.pntd.0001015
- 396 10. Barker-Hudson P, Jones R, Kay BH. Categorization of Domestic Breeding Habitats of *Aedes aegypti*  
397 (*Diptera: Culicidae*) in Northern Queensland, Australia. *J Med Entomol.* 1988;25: 178–182.  
398 doi:10.1093/jmedent/25.3.178
- 399 11. Fuller TL, Calvet G, Estevam CG, Angelo JR, Abiodun GJ, Halai U-A, et al. Behavioral, climatic, and  
400 environmental risk factors for Zika and Chikungunya virus infections in Rio de Janeiro, Brazil, 2015-  
401 16. *PLOS ONE.* 2017;12: e0188002. doi:10.1371/journal.pone.0188002
- 402 12. Garcia Serpa Osorio-de-Castro C, Silva Miranda E, Machado de Freitas C, Rochel de Camargo K,  
403 Cranmer HH. The Zika Virus Outbreak in Brazil: Knowledge Gaps and Challenges for Risk Reduction.  
404 *Am J Public Health.* 2017;107: 960–965. doi:10.2105/AJPH.2017.303705



- 405 13. Silva MMO, Tauro LB, Kikuti M, Anjos RO, Santos VC, Gonçalves TSF, et al. Concomitant  
406 Transmission of Dengue, Chikungunya, and Zika Viruses in Brazil: Clinical and Epidemiological  
407 Findings From Surveillance for Acute Febrile Illness. *Clin Infect Dis*. 2019;69: 1353–1359.  
408 doi:10.1093/cid/ciy1083
- 409 14. Pinheiro GG, Rocha MN, de Oliveira MA, Moreira LA, Andrade Filho JD. Detection of Yellow Fever  
410 Virus in Sylvatic Mosquitoes during Disease Outbreaks of 2017–2018 in Minas Gerais State, Brazil.  
411 *Insects*. 2019;10: 136. doi:10.3390/insects10050136
- 412 15. Codeço CT, Luz PM, Struchiner CJ. Risk assessment of yellow fever urbanization in Rio de Janeiro,  
413 Brazil. *Trans R Soc Trop Med Hyg*. 2004;98: 702–710. doi:10.1016/j.trstmh.2003.12.019
- 414 16. Barbieri AF, Guedes GR, Noronha K, Queiroz BL, Domingues EP, Rigotti JIR, et al. Population  
415 transitions and temperature change in Minas Gerais, Brazil: a multidimensional approach. *Revista*  
416 *Brasileira de Estudos de População*. 2015;32: 461–488. doi:10.1590/S0102-3098201500000028
- 417 17. DATASUS. [cited 10 Mar 2021]. Available:  
418 [http://www2.datasus.gov.br/DATASUS/index.php?area=0203&id=29892110&VObj=http://tabnet.](http://www2.datasus.gov.br/DATASUS/index.php?area=0203&id=29892110&VObj=http://tabnet.datasus.gov.br/cgi/deftohtm.exe?sinannet/cnv/febreamarela)  
419 [datasus.gov.br/cgi/deftohtm.exe?sinannet/cnv/febreamarela](http://www2.datasus.gov.br/DATASUS/index.php?area=0203&id=29892110&VObj=http://tabnet.datasus.gov.br/cgi/deftohtm.exe?sinannet/cnv/febreamarela)
- 420 18. Pereira RHM, Gonçalves CN, et. al. geobr: Loads Shapefiles of Official Spatial Data Sets of Brazil.  
421 2019. Available: GitHub repository - <https://github.com/ipeaGIT/geobr>
- 422 19. Quadro Geográfico de Referência para Produção, Análise e Disseminação de Estatísticas | 2019 |  
423 IBGE. [cited 10 Mar 2021]. Available: [https://www.ibge.gov.br/geociencias/organizacao-do-](https://www.ibge.gov.br/geociencias/organizacao-do-territorio/analises-do-territorio/24233-quadro-geografico-de-referencia-para-producao-analise-e-disseminacao-de-estatisticas.html?=&t=o-que-e)  
424 [territorio/analises-do-territorio/24233-quadro-geografico-de-referencia-para-producao-analise-e-](https://www.ibge.gov.br/geociencias/organizacao-do-territorio/analises-do-territorio/24233-quadro-geografico-de-referencia-para-producao-analise-e-disseminacao-de-estatisticas.html?=&t=o-que-e)  
425 [disseminacao-de-estatisticas.html?=&t=o-que-e](https://www.ibge.gov.br/geociencias/organizacao-do-territorio/analises-do-territorio/24233-quadro-geografico-de-referencia-para-producao-analise-e-disseminacao-de-estatisticas.html?=&t=o-que-e)

- 426 20. Fick SE, Hijmans RJ. WorldClim 2: new 1-km spatial resolution climate surfaces for global land  
427 areas. *Int J Climatol*. 2017;37: 4302–4315. doi:10.1002/joc.5086
- 428 21. WorldPop,, Bondarenko, Maksym. Individual Countries 1km Population Density (2000-2020).  
429 University of Southampton; 2020. doi:10.5258/SOTON/WP00674
- 430 22. Gozzo LF, Palma DS, Custodio MS, Machado JP. Climatology and Trend of Severe Drought Events in  
431 the State of Sao Paulo, Brazil, during the 20th Century. *Atmosphere*. 2019;10: 190.  
432 doi:10.3390/atmos10040190
- 433 23. Giovanetti M, de Mendonça MCL, Fonseca V, Mares-Guia MA, Fabri A, Xavier J, et al. Yellow Fever  
434 Virus Reemergence and Spread in Southeast Brazil, 2016–2019. Pfeiffer JK, editor. *Journal of*  
435 *Virology*. 2019;94. doi:10.1128/JVI.01623-19
- 436 24. Cunha M dos P, Duarte-Neto AN, Pour SZ, Ortiz-Baez AS, Černý J, Pereira BB de S, et al. Origin of  
437 the São Paulo Yellow Fever epidemic of 2017–2018 revealed through molecular epidemiological  
438 analysis of fatal cases. *Scientific Reports*. 2019;9: 20418. doi:10.1038/s41598-019-56650-1
- 439 25. Moreira-Soto A, Torres MC, Lima de Mendonça MC, Mares-Guia MA, dos Santos Rodrigues CD,  
440 Fabri AA, et al. Evidence for multiple sylvatic transmission cycles during the 2016–2017 yellow  
441 fever virus outbreak, Brazil. *Clinical Microbiology and Infection*. 2018;24: 1019.e1-1019.e4.  
442 doi:10.1016/j.cmi.2018.01.026
- 443 26. Possas C, Lourenço-de-Oliveira R, Tauil PL, Pinheiro F de P, Pissinatti A, da Cunha RV, et al. Yellow  
444 fever outbreak in Brazil: the puzzle of rapid viral spread and challenges for immunisation. *Mem*  
445 *Inst Oswaldo Cruz*. 2018;113. doi:10.1590/0074-02760180278

- 446 27. Cunha APMA, Zeri M, Deusdará Leal K, Costa L, Cuartas LA, Marengo JA, et al. Extreme Drought  
447 Events over Brazil from 2011 to 2019. *Atmosphere*. 2019;10: 642. doi:10.3390/atmos10110642
- 448 28. Reiter P, Cordellier R, Ouma JO, Cropp CB, Savage HM, Sanders EJ, et al. H: First recorded outbreak  
449 of yellow fever. in Kenya, 1992–1993 II Entomologic investigations *Am J Trop Med Hyg*. 1998. pp.  
450 59–650.
- 451 29. Zhao S, Stone L, Gao D, He D. Modelling the large-scale yellow fever outbreak in Luanda, Angola,  
452 and the impact of vaccination. *PLOS Neglected Tropical Diseases*. 2018;12: e0006158.  
453 doi:10.1371/journal.pntd.0006158
- 454 30. Causey OR, Kumm HW, Laemmert HW. Dispersion of Forest Mosquitoes in Brazil: Further Studies.  
455 *The American Journal of Tropical Medicine and Hygiene*. 1950;s1-30: 301–312.  
456 doi:10.4269/ajtmh.1950.s1-30.301
- 457 31. Bicca-Marques JC, de Freitas DS. The Role of Monkeys, Mosquitoes, and Humans in the Occurrence  
458 of a Yellow Fever Outbreak in a Fragmented Landscape in South Brazil: Protecting Howler Monkeys  
459 is a Matter of Public Health. *Tropical Conservation Science*. 2010;3: 78–89.  
460 doi:10.1177/194008291000300107
- 461 32. Estrada A, Coates-Estrada R. Tropical rain forest fragmentation and wild populations of primates at  
462 Los Tuxtlas, Mexico. *Int J Primatol*. 1996;17: 759–783. doi:10.1007/BF02735263
- 463 33. Amato KR, Yeoman CJ, Kent A, Righini N, Carbonero F, Estrada A, et al. Habitat degradation impacts  
464 black howler monkey (*Alouatta pigra*) gastrointestinal microbiomes. *ISME J*. 2013;7: 1344–1353.  
465 doi:10.1038/ismej.2013.16

- 466 34. Arroyo-Rodríguez V, Dias PAD. Effects of habitat fragmentation and disturbance on howler  
467 monkeys: a review. *Am J Primatol.* 2010;72: 1–16. doi:10.1002/ajp.20753
- 468 35. Hagan RW, Didion EM, Rosselot AE, Holmes CJ, Siler SC, Rosendale AJ, et al. Dehydration prompts  
469 increased activity and blood feeding by mosquitoes. *Scientific Reports.* 2018;8: 6804.  
470 doi:10.1038/s41598-018-24893-z
- 471 36. Quick Index Survey for *Aedes aegypti* (LIRAA) - [www.rio.rj.gov.br](http://www.rio.rj.gov.br). [cited 13 Apr 2021]. Available:  
472 <http://www.rio.rj.gov.br/web/sms/lira>
- 473 37. Fontenille D, Diallo M, Mondo M, Ndiaye M, Thonnon J. First evidence of natural vertical  
474 transmission of yellow fever virus in *Aedes aegypti*, its epidemic vector. *Trans R Soc Trop Med Hyg.*  
475 1997;91: 533–535. doi:10.1016/S0035-9203(97)90013-4
- 476 38. Marini G, Guzzetta G, Baldacchino F, Arnoldi D, Montarsi F, Capelli G, et al. The effect of  
477 interspecific competition on the temporal dynamics of *Aedes albopictus* and *Culex pipiens*.  
478 *Parasites & Vectors.* 2017;10: 102. doi:10.1186/s13071-017-2041-8
- 479 39. Domingues CMAS, Maranhão AGK, Teixeira AM, Fantinato FFS, Domingues RAS, Domingues CMAS,  
480 et al. The Brazilian National Immunization Program: 46 years of achievements and challenges.  
481 *Cadernos de Saúde Pública.* 2020;36. doi:10.1590/0102-311x00222919
- 482 40. Noronha TG de, Camacho LAB, Noronha TG de, Camacho LAB. Controvérsias sobre a ampliação das  
483 áreas com vacinação de rotina contra a febre amarela no Brasil. *Cadernos de Saúde Pública.*  
484 2017;33. doi:10.1590/0102-311x00060917
- 485
